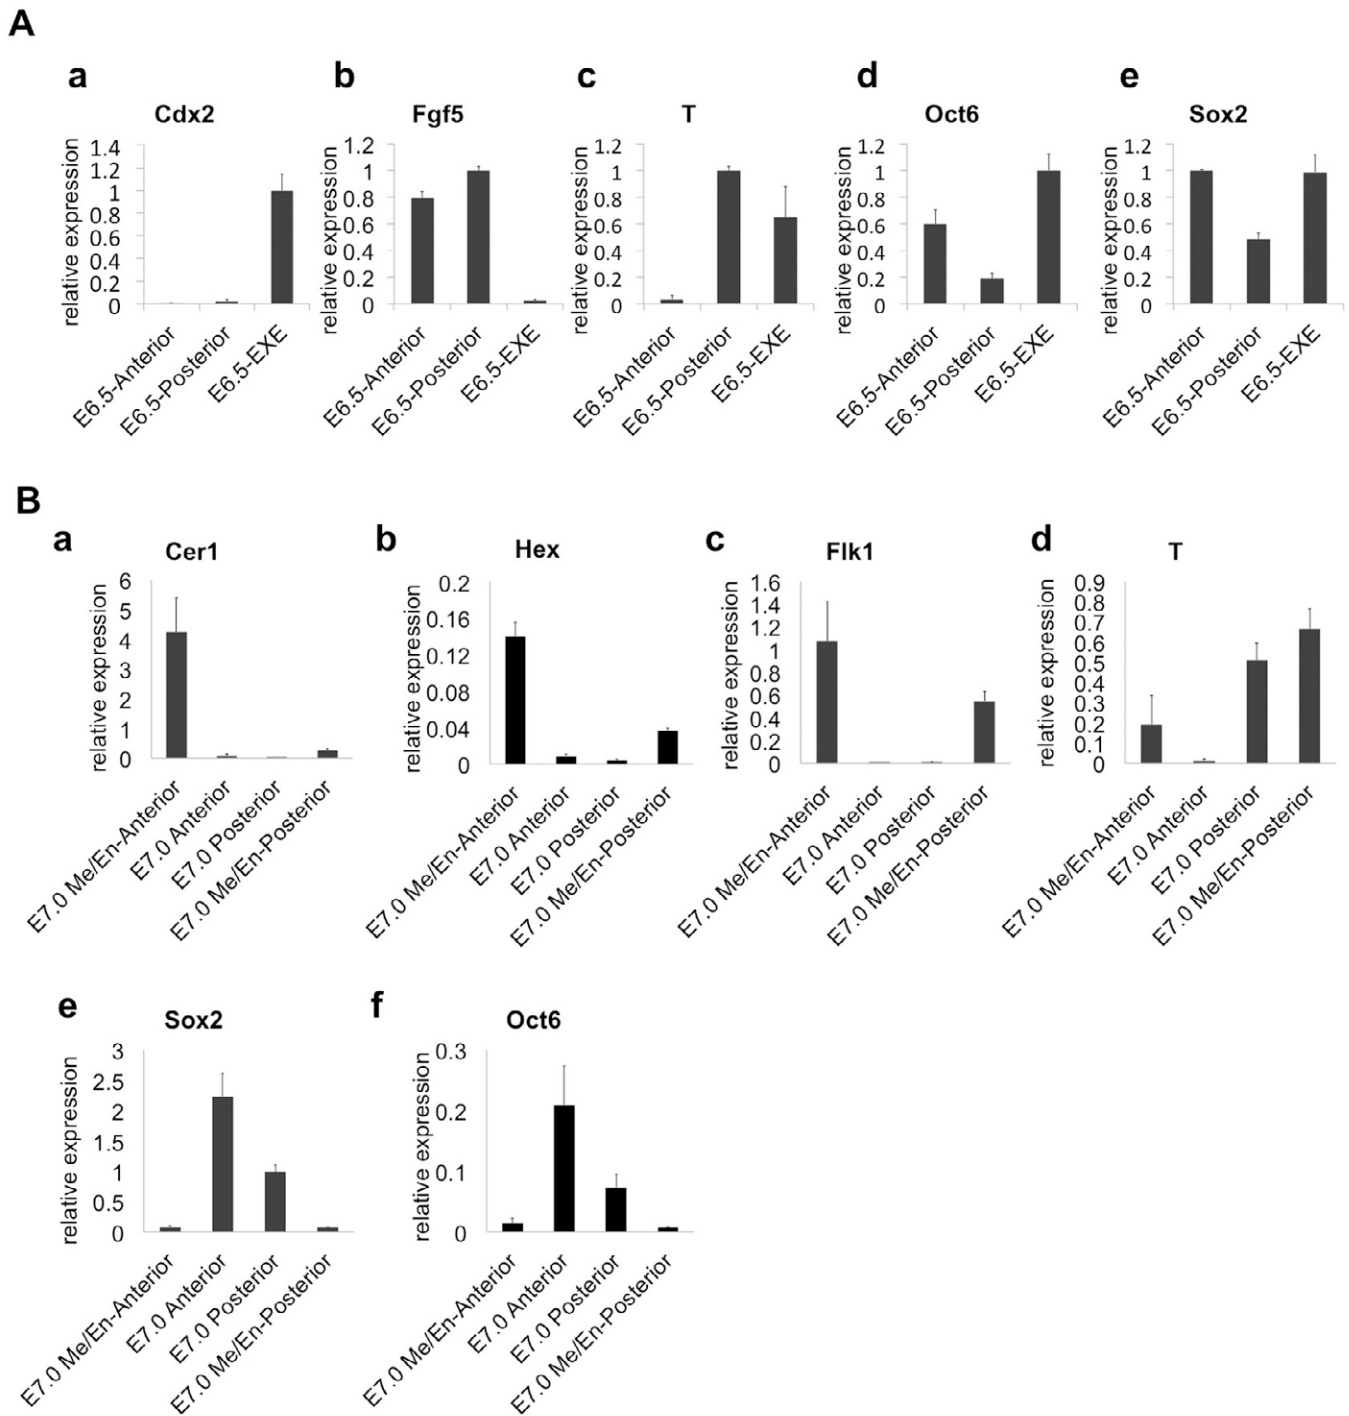

**Fig. S1.** Detection of various lineage markers expression in harvested tissues to assess potential contamination from non-ectodermal tissues. (A) RT-qPCR analysis of marker gene expression in tissues separated from E6.5 mouse embryo, including the anterior portion of the embryonic ectoderm (E6.5-Anterior), the posterior portion of the embryonic ectoderm (E6.5-Posterior) and the ExE (E6.5-EXE). (B) RT-qPCR analysis of marker gene expression in tissues obtained from the E7.0 mouse embryo, including the anterior part of the mesoderm and endoderm (Me/En-Anterior), the anterior portion of the ectodermal layer (Anterior), the posterior portion of the ectodermal layer (Posterior) and the posterior part of the mesoderm and endoderm (Me/En-Posterior).

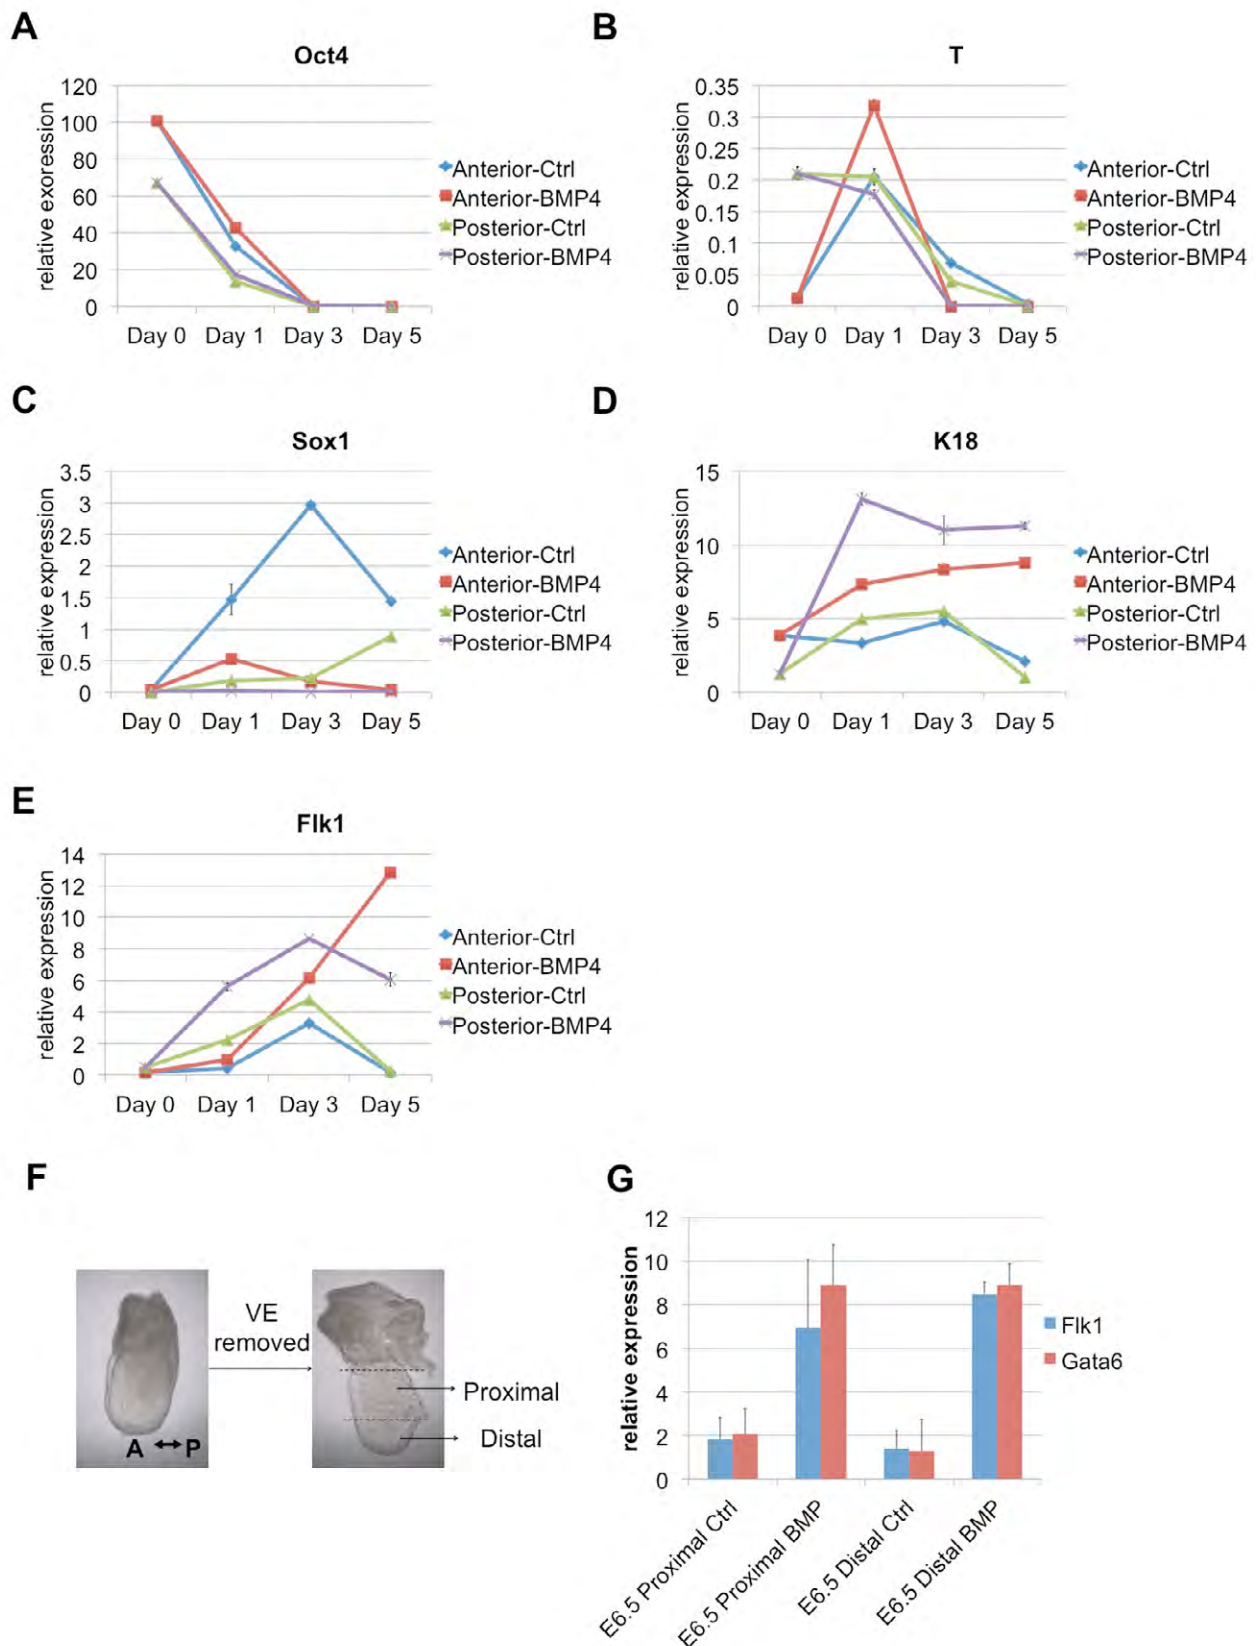

**Fig. S2.** E6.5 explants culture in control and BMP4-supplemented medium. (A-E) Marker genes expression (*Oct3/4*, *T*, *Sox1*, *K18*, *Flk1*) is analyzed during the 5 days culture of E6.5 anterior and posterior explants in the medium without or with BMP4. Each sample has epiblast tissue from three embryos. (F) A schematic showing how the epiblast is cut into proximal and distal portions. (G) RT-qPCR analysis of *Flk1* and *Gata6* in proximal and distal explants after 5 days culture with or without BMP4. There are three replicates for each group of data.

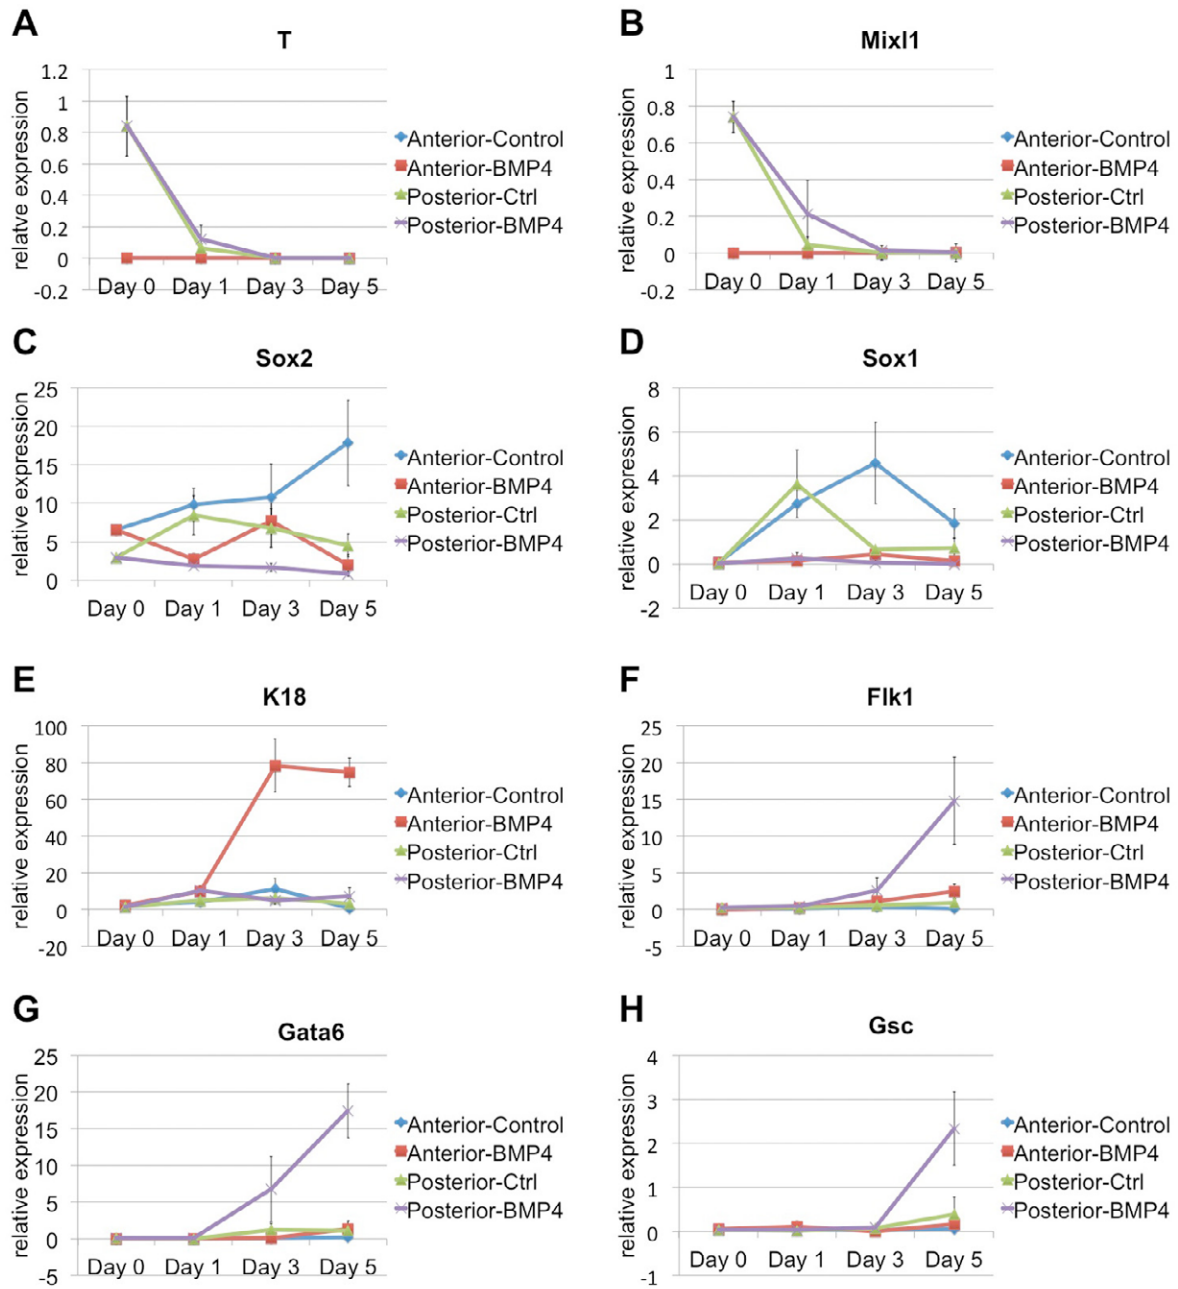

**Fig. S3.** The lineage progression of E7.0 anterior and posterior explants cultured without or with BMP4 for 5 days. (A-H) The expression of *T*, *Mixl1*, *Sox2*, *Sox1*, *K18*, *Flk1*, *Gata6* and *Gsc* is analyzed through RT-qPCR. There are four replicates for each group of data.

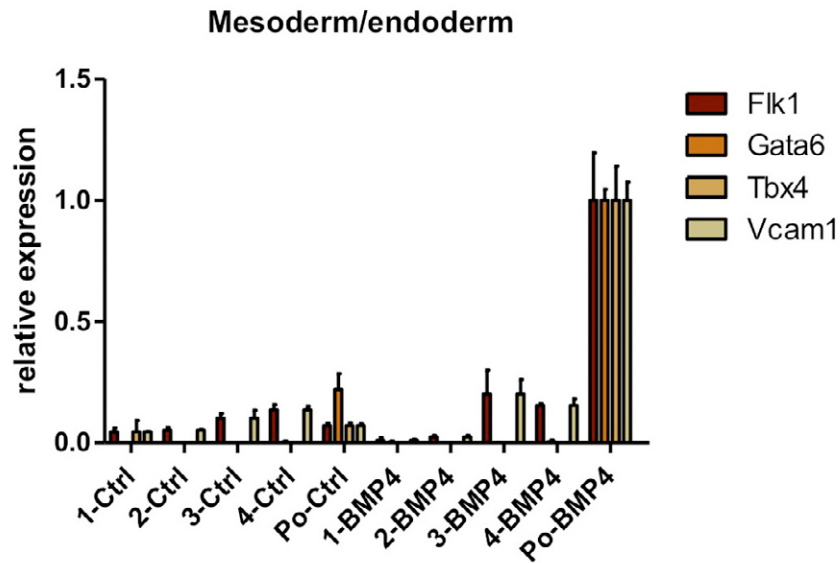

**Fig. S4.** Mesoderm/endoderm marker genes expression in the derivatives of E7.0 A/P fragments 1, 2, 3, 4. RT-qPCR analysis of mesoderm/endoderm marker genes expression in derivatives of fragments 1, 2, 3, 4 and posterior explants that have been cultured in control or BMP4-added medium for 5 days.

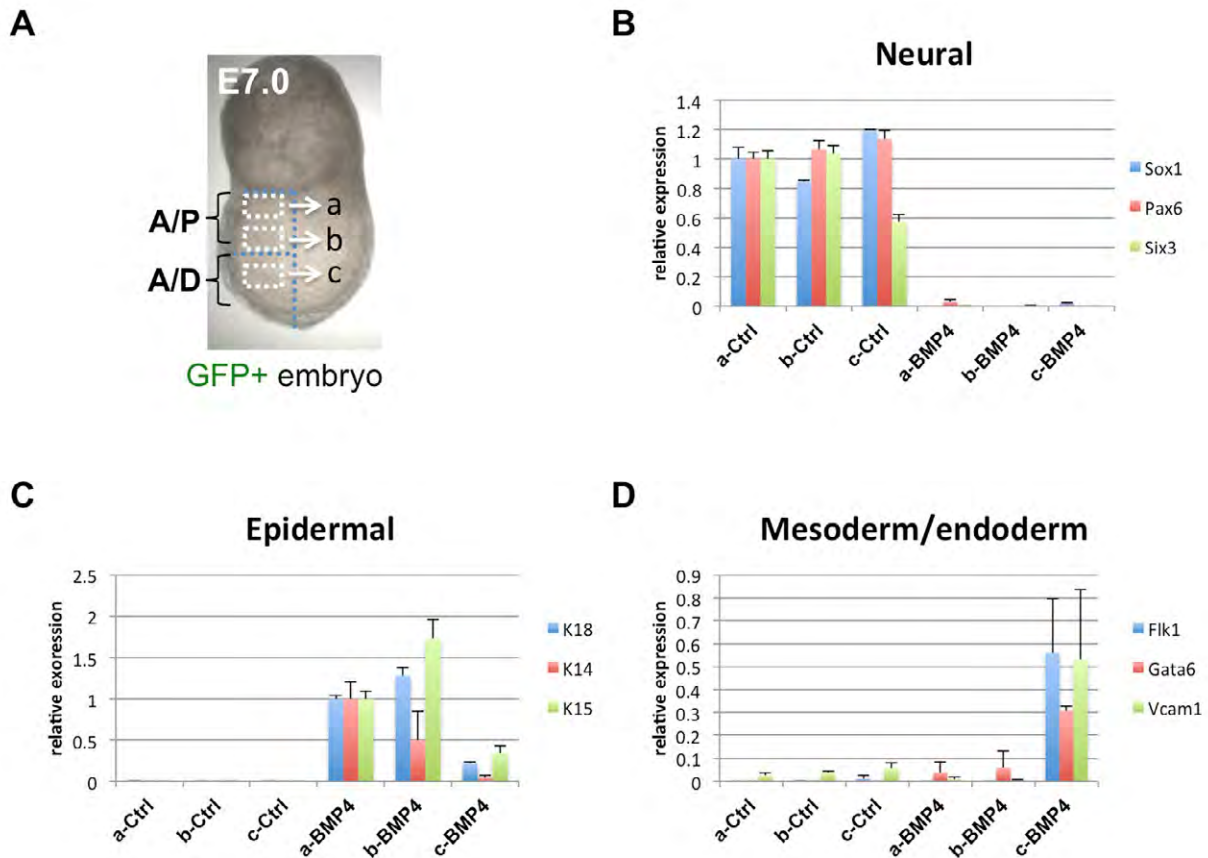

**Fig. S5.** Regionalization of ectodermal progenitor potential in E7.0 ectodermal layer. (A) Schematic illustrating locations of fragments a, b and c in anterior ectoderm region. (B-D) RT-qPCR analysis of neural (*Sox1*, *Pax6*, *Six3*), epidermal (*K18*, *K14*, *K15*) and mesoderm/endoderm (*Flk1*, *Gata6*, *Vcam1*) marker genes expression in derivatives of fragments a, b and c co-cultured with large anterior ectoderm explants for five days.

Table S1. Primer sequences (5'→3') for RT-qPCR

| Genes       | 5' primer               | 3' primer                 |
|-------------|-------------------------|---------------------------|
| Hhex/Hex    | CGGACGGTGAACGACTACAC    | CGTTGGAGAACCTCACTTGAC     |
| Pou5f1/Oct4 | AGTTGGCGTGGAGACTTTGC    | CAGGGCTTTCATGTCCTGG       |
| Pou3f1/Oct6 | TCGAGGTGGGTGTCAAAGG     | GGCGCATAAACGTCGTCCA       |
| Nanog       | TTGCTTACAAGGGTCTGCTACT  | ACTGGTAGAAGAATCAGGGCT     |
| Nodal       | CCTGGAGCGCATTGGATG      | ACTTTTCTGCTCGACTGGACA     |
| Fgf5        | GCTGTGTCTCAGGGGATTGT    | CACTCTCGGCCTGTCTTTTC      |
| Sox2        | GCGGAGTGGAAACTTTTGTCC   | CGGGAAGCGTGTACTTATCCTT    |
| Sox1        | GCACACAGCGTTTTCTCGG     | ACATCCGACTCCTCTTCCC       |
| Krt18/K18   | CAGCCAGCGTCTATGCAGG     | CTTCTCGGTCTGGATTCCAC      |
| Krt19/K19   | GGGGGTTTCAGTACGCATTGG   | GAGGACGAGGTCACGAAGC       |
| Brachyury/T | CTCGGATTCACATCGTGAGAG   | AAGGCTTTAGCAAATGGGTTGTA   |
| Kdr/Flk1    | GGGTCGATTTCAAACCTCAATGT | AGAGTAAAGCCTATCTCGCTGT    |
| Sox17       | CGAGCCAAAGCGGAGTCTC     | TGCCAAGGTCAACGCCTTC       |
| Gata6       | TTGCTCCGGTAAACAGCAGTG   | GTGGTCGCTTGTGTAGAAGGA     |
| Gata4       | CCCTACCCAGCCTACATGG     | ACATATCGAGATTGGGGTGTCT    |
| Eomes       | CCTGGTGGTGTTTTGTGTG     | TTAATAGCACCGGGCACTC       |
| Cdx2        | GCTACGGCGAACTTGGACA     | GTGATGGTGCGCGTGGTAT       |
| Krt8/K8     | TCCATCAGGGTGA CT CAGAAA | CCAGCTTCAAGGGGCTCAA       |
| Krt5/K5     | TCCAGTGTGTCCTTCCGAAGT   | TGCCTCCGCCAGAACTGTA       |
| Krt14/K14   | AAGGTCATGGATGTGCACGAT   | CAGCATGTAGCAGCTTTAGTTCTTG |
| Krt15/K15   | AGCTATTGCAGAGAAAAACCGT  | GGTCCGTCTCAGGTCTGTG       |
| ΔNp63       | TGTACCTGGAAAACAATGCCCA  | GACGAGGAGCCGTTCTGAATCT    |
| Tbx4        | TCCCCAGCTACAAGGTAAAAGT  | ACCATCCATTTGTTGTCACAGAA   |

|                 |                        |                        |
|-----------------|------------------------|------------------------|
| Vcam1           | AGTTGGGGATTTCGGTTGTTCT | CCCCTCATTCCCTTACCACCC  |
| Mtap2/MAP2      | GCCAGCCTCGGAACAAACA    | GCTCAGCGAATGAGGAAGGA   |
| Cer1            | CTCTGGGGAAGGCAGACCTAT  | CCACAAACAGATCCGGCTT    |
| Krt17/K17       | ACCATCCGCCAGTTTACCTC   | CTACCCAGGCCACTAGCTGA   |
| Six3            | CCGGAAGAGTTGTCCATGTTC  | CGACTCGTGTTTGTGATGGC   |
| Cdh1/E-cadherin | CAGGTCTCCTCATGGCTTTGC  | CTCCGAAAAGAAGGCTGTCC   |
| Pax6            | GCAGATGCAAAAGTCCAGGTG  | CAGGTTGCGAAGAACTCTGTTT |
| Id1             | GGTCCGAGGCAGAGTATTACA  | CCTGAAAAGTAAGGAAGGGGGA |
| Id2             | ATGAAAGCCTTCAGTCCGGTG  | AGCAGACTCATCGGGTCGT    |
| Hand1           | GGCAGCTACGCACATCATCA   | CCTGGCATCGGGACCATAG    |
| Mesp2           | CGGCGTTCTCTCACCGATG    | CACCCCACTACTCATGGCTG   |
| Mixl1           | ACGCAGTGCTTTCCAAACC    | CCCGCAAGTGGATGTCTGG    |
| Gsc             | CAGATGCTGCCCTACATGAAC  | TCTGGGTACTTCGTCTCCTGG  |
| Sox7            | ATGCTGGGAAAGTCATGGAAG  | CGTGTTCTGGTCACGAGAGA   |
| MyoD            | CCACTCCGGGACATAGACTTG  | AAAAGCGCAGGTCTGGTGAG   |

Table S2. Primer sequences (5'→3') for *in situ* probes

|                                            |
|--------------------------------------------|
| T: Fwd: ATCAAGCTTCTGGGAGCTCAGTTCTTTTCGAGGC |
| T: Rev: ATCGGATCCGTGGACGAATTCCAGGATTTCAAAG |
| Hesx1: Fwd: CCGAATTCGGAAGGTGCTCAGCTC       |
| Hesx1: Rev: GCTCTAGAACTGTGATTCTCTACGGGAC   |
| Sox2: Fwd: GGAATTCAAAGGAAAAAAAAATCTCCG     |
| Sox2: Rev: GCTCTAGAACGTTTGCCTTAAACAA       |
| Oct6: Fwd: TTAAACAAAACCAAACACCCG           |
| Oct6: Rev: CGATTTAAATTAAGGGCGCG            |

|                                        |
|----------------------------------------|
| Krt18: Fwd: CTCCAGACAAGATGAGCTTCACA    |
| Krt18: Rev: CTCCATCTGTGCCTTGTATCG      |
| Six3: Fwd: GCGCACTACCAGGAGGCCGAGAA     |
| Six3: Rev: GTGTGTATCTGTCTGTGTATCCTGATT |
| Fgf5: Fwd: CCGGAAGAATGAGCCTGTCCTT      |
| Fgf5: Rev: GAGCATCATCCAAAGCGAACTTC     |
